# Supplementary material
Source: publisher figshare collection journal article supplement (https://karger.figshare.com/articles/dataset/_/11346650)
Supplement: Supplementary file 1 [file 1]

## Supplementary Material 1

<https://www.youtube.com/watch?v=jxYNLCYTwZQ>  
<https://www.youtube.com/watch?v=qfpJg179YNk>  
<https://www.youtube.com/watch?v=d2wkdrScerU>  
<https://www.youtube.com/watch?v=ct3tHDfNKiQ>  
[https://www.youtube.com/watch?v=Dc\\_aoUCqw2E](https://www.youtube.com/watch?v=Dc_aoUCqw2E)  
<https://www.youtube.com/watch?v=tvHytTIGs0M>  
<https://www.youtube.com/watch?v=0QQxKN-KC1U>  
<https://www.youtube.com/watch?v=De4HdyocTHY>  
<https://www.youtube.com/watch?v=DYfjPnty2Ho>  
<https://www.youtube.com/watch?v=q6WsoL3J8U8>  
<https://www.youtube.com/watch?v=CTSLdNxN1cc>  
<https://www.youtube.com/watch?v=T2MtUVpdAyg>  
<https://www.youtube.com/watch?v=tfc5cXiXMDc>  
[https://www.youtube.com/watch?v=rkF\\_uMizqoc](https://www.youtube.com/watch?v=rkF_uMizqoc)  
<https://www.youtube.com/watch?v=5905FxXz9dl>  
<https://www.youtube.com/watch?v=lzPMblll3LE>  
<https://www.youtube.com/watch?v=h2FLCKMcEX0>  
<https://www.youtube.com/watch?v=2Mw-s5jnqXU>  
<https://www.youtube.com/watch?v=diuuEXKzNB8>  
<https://www.youtube.com/watch?v=dg-l9j76-t8>  
<https://www.youtube.com/watch?v=TK4CveeCWfY>  
<https://www.youtube.com/watch?v=4k0ziD0j5BI>  
<https://www.youtube.com/watch?v=CsDXlt7Ei1c>  
[https://www.youtube.com/watch?v=7Ez5Wc\\_esBg](https://www.youtube.com/watch?v=7Ez5Wc_esBg)  
<https://www.youtube.com/watch?v=NfKZNt25L-Q>  
<https://www.youtube.com/watch?v=NaOVmYoljbs>  
<https://www.youtube.com/watch?v=XrpB4DTNQZw>  
<https://www.youtube.com/watch?v=h-GtQfDCoAE>  
<https://www.youtube.com/watch?v=u2KMBD5-oCg>  
<https://www.youtube.com/watch?v=A5s2ZgwQ1VM>

<https://www.youtube.com/watch?v=ekqLlw-Xe68>  
<https://www.youtube.com/watch?v=6LK6yHtlung>  
<https://www.youtube.com/watch?v=tZtJaS2ZtME>  
<https://www.youtube.com/watch?v=AQOeIVbhFm4>  
<https://www.youtube.com/watch?v=elAtjXsj8Jg>  
<https://www.soundsnap.com/node/90850>  
<https://www.soundsnap.com/node/27240>  
<https://www.soundsnap.com/node/28608>  
<https://www.soundsnap.com/node/27471>  
<https://www.soundsnap.com/node/26976>  
<https://www.youtube.com/watch?v=9RjZr8V8PNY>  
<https://www.youtube.com/watch?v=6mcpuDVN6lQ>  
<https://www.youtube.com/watch?v=zjd4HrJbc8o>  
<https://www.youtube.com/watch?v=iYxUHA-Pwsk>  
<https://www.youtube.com/watch?v=1UDFq2InljM>  
<https://www.youtube.com/watch?v=LkxvBb2VXbs>
