# Supplementary material
Source: publisher figshare collection journal article supplement (https://karger.figshare.com/articles/dataset/_/11346650)
Supplement: Supplementary file 2 [file 1]

## Supplementary Material 2

[https://www.youtube.com/watch?v=3\\_AdbM4-rcA](https://www.youtube.com/watch?v=3_AdbM4-rcA)

<https://www.youtube.com/watch?v=D7ZZp8XuUTE>

<https://www.youtube.com/watch?v=Xvwl4IfXW98>

<https://www.youtube.com/watch?v=DQqETTh7EOLM>

<https://www.youtube.com/watch?v=pbEPA6DoPPw>

[https://www.youtube.com/watch?v=PHBJNN-M\\_Mo](https://www.youtube.com/watch?v=PHBJNN-M_Mo)

[https://www.youtube.com/watch?v=if0nOJy\\_Efc&t=3072s](https://www.youtube.com/watch?v=if0nOJy_Efc&t=3072s)

<https://www.youtube.com/watch?v=GJCUfFwwWB4>

<https://www.youtube.com/watch?v=jAg6tyC9Xxc>
